# Supplementary material
Source: MDPI journal article supplement (https://www.mdpi.com/2073-4441/13/9/1178)
Supplement: s1 [file s1]

# **Effects of ferrihydrite-impregnated powdered activated carbon on phosphate removal and biofouling of ultrafiltration membrane.**

Jenyuk Lohwacharin <sup>1</sup>\*, Thitiwut Maliwan<sup>1</sup>, Hideki Osawa<sup>2</sup>, Satoshi Takizawa<sup>2</sup>

<sup>1</sup>Department of Environmental Engineering, Faculty of Engineering, Chulalongkorn University,  
254 Phyathai Road, Wangmai, Pathumwan Bangkok 10330, Thailand

<sup>2</sup>Department of Urban Engineering, Graduate School of Engineering, the University of Tokyo, 7-  
3-1 Hongo, Bukyo-ku, Tokyo 113-8656 Japan

## **Supplementary Data**

*Submitted to Water (Special Issue: Water Pollution and Sanitation)*

\* Corresponding author. Tel: + 66 2 218 6671; Fax: + 66 2 218 6666; E-mail address:

[Jenyuk.L@chula.ac.th](mailto:Jenyuk.L@chula.ac.th)

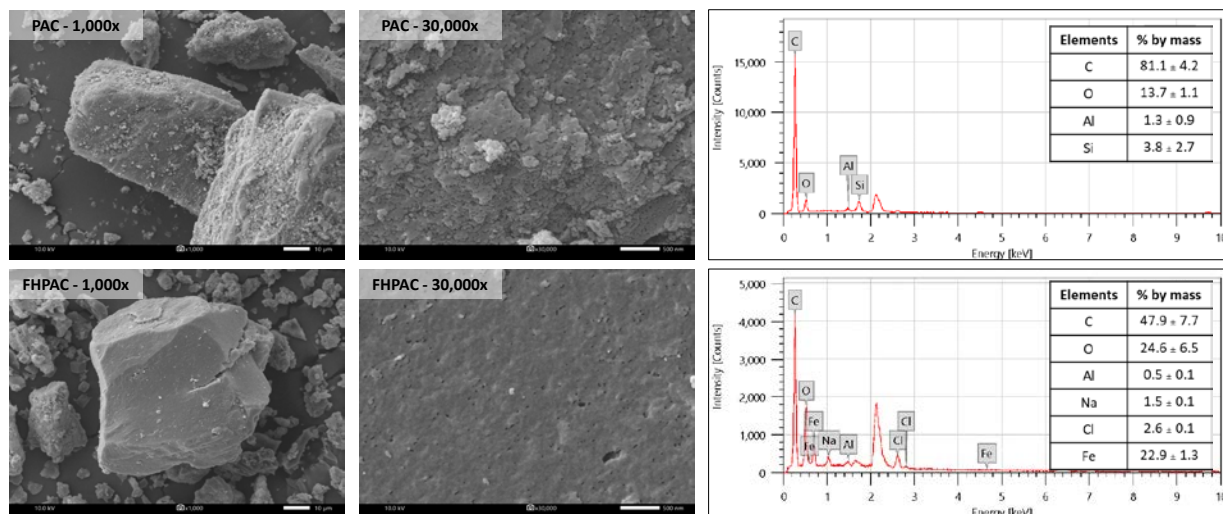

**Figure S1** SEM images of PAC and FHPAC at different magnification levels (1,000x and 30,000x) and elemental compositions analysis by SEM-EDS.

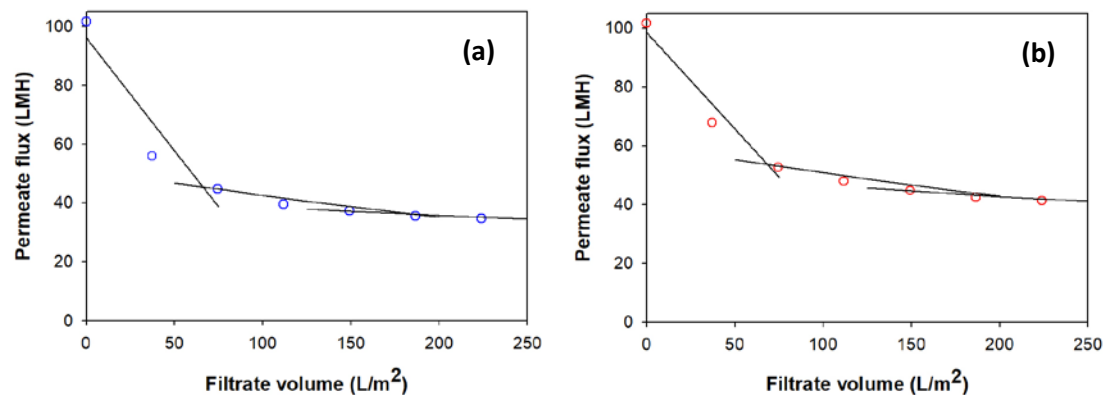

**Figure S2** Mathematical models of fouling mechanism in biofouling test of (a) PAC+UF and (b) FHPAC+UF

**Table S1** Tap water quality from the Metropolitan Waterworks Authority, Bangkok, Thailand  
(October 2020)

| Parameters             | Unit                      | Result         |
|------------------------|---------------------------|----------------|
| True color             | TCU                       | 1              |
| Apparent color         | Pt-Co                     | < 5            |
| Turbidity              | NTU                       | 0.45           |
| pH                     | -                         | 6.88           |
| Conductivity           | μS/cm                     | 299            |
| Alkalinity             | mg/L as CaCO <sub>3</sub> | 66             |
| Total solids           | mg/L                      | 180            |
| Total dissolved solids | mg/L                      | 179            |
| Chloride               | mg/L                      | 21             |
| Sulfate                | mg/L                      | 44             |
| Ammonia-nitrogen       | mg/L                      | ND             |
| Nitrate-nitrate        | mg/L                      | 2.82           |
| Nitrite-nitrite        | mg/L                      | ND             |
| Calcium                | mg/L                      | 26.0           |
| Iron                   | mg/L                      | < 0.05         |
| Fluoride               | mg/L                      | 0.34           |
| Manganese              | mg/L                      | 0.056          |
| Magnesium              | mg/L                      | 6.00           |
| Chlorine residual      | mg/L                      | 1.98           |
| Total Bacteria         | CFU/ml                    | 0              |
| <i>E.Coli</i>          | Detectable/100 ml         | non-detectable |

**Table S2** Kinetic parameters of phosphate onto PAC and FHPAC with an initial phosphate concentration of 1.0 mg PO<sub>4</sub><sup>3-</sup>/L.

| Adsorbents | q <sub>e,exp</sub><br>(mg/g) | Pseudo-first-order                  |                           |                | Pseudo-second-order                                    |                           |                |
|------------|------------------------------|-------------------------------------|---------------------------|----------------|--------------------------------------------------------|---------------------------|----------------|
|            |                              | k <sub>1</sub> (min <sup>-1</sup> ) | q <sub>e,cal</sub> (mg/g) | R <sup>2</sup> | k <sub>2</sub> (g mg <sup>-1</sup> min <sup>-1</sup> ) | q <sub>e,cal</sub> (mg/g) | R <sup>2</sup> |
| PAC        | 0.80                         | 3.34                                | 0.71                      | 0.298          | 2377.02                                                | 0.71                      | 0.848          |
| FHPAC      | 4.80                         | 30.92                               | 4.08                      | 0.835          | 0.053                                                  | 5.01                      | 0.985          |

**Table S3** Isotherm parameters of phosphate onto FHPAC with the variation of initial phosphate concentration from 0.1 – 13.7 mg PO<sub>4</sub><sup>3-</sup>/L.

| Adsorbents | Langmuir                 |                          |                | Freundlich               |      |                |
|------------|--------------------------|--------------------------|----------------|--------------------------|------|----------------|
|            | q <sub>m</sub><br>(mg/g) | K <sub>L</sub><br>(L/mg) | R <sup>2</sup> | K <sub>F</sub><br>(L/mg) | n    | R <sup>2</sup> |
| FHPAC      | 22.32                    | 0.97                     | 0.921          | 7.66                     | 1.81 | 0.924          |

**Table S4** Mathematical models of fouling mechanism in biofouling test of PAC and FHPAC

| Experiment | Complete blocking                 |                | Intermediate blocking                            |                | Cake filtration                                    |                |
|------------|-----------------------------------|----------------|--------------------------------------------------|----------------|----------------------------------------------------|----------------|
|            | K <sub>b</sub> (h <sup>-1</sup> ) | R <sup>2</sup> | K <sub>i</sub> (m <sup>2</sup> L <sup>-1</sup> ) | R <sup>2</sup> | K <sub>c</sub> (h m <sup>4</sup> L <sup>-2</sup> ) | R <sup>2</sup> |
| PAC        | 0.762                             | 0.891          | 0.0019                                           | 0.964          | 4×10 <sup>-5</sup>                                 | 0.985          |
| FHPAC      | 0.656                             | 0.954          | 0.0017                                           | 0.992          | 4×10 <sup>-5</sup>                                 | 0.987          |

**Table S5** Fouling mechanism of PAC+UF and FHPAC+UF bench scale operation via mathematical models.

| Cycle        | Complete blocking                 |                | Standard blocking                                |                | Intermediate blocking                            |                | Cake filtration                                    |                |
|--------------|-----------------------------------|----------------|--------------------------------------------------|----------------|--------------------------------------------------|----------------|----------------------------------------------------|----------------|
|              | K <sub>b</sub> (h <sup>-1</sup> ) | R <sup>2</sup> | K <sub>s</sub> (m <sup>2</sup> L <sup>-1</sup> ) | R <sup>2</sup> | K <sub>i</sub> (m <sup>2</sup> L <sup>-1</sup> ) | R <sup>2</sup> | K <sub>c</sub> (h m <sup>4</sup> L <sup>-2</sup> ) | R <sup>2</sup> |
| <b>PAC</b>   |                                   |                |                                                  |                |                                                  |                |                                                    |                |
| 1            | -0.0764                           | 0.804          | -0.0024                                          | 0.887          | 0.004                                            | 0.998          | -1.4×10 <sup>-5</sup>                              | 0.837          |
| 2            | -0.0273                           | 0.988          | 0.0004                                           | 0.900          | 0.0045                                           | 0.937          | 4.0×10 <sup>-6</sup>                               | 0.790          |
| 3            | -0.0274                           | 0.787          | 0.0004                                           | 0.954          | 0.0051                                           | 0.981          | 6.0×10 <sup>-6</sup>                               | 0.886          |
| <b>FHPAC</b> |                                   |                |                                                  |                |                                                  |                |                                                    |                |
| 1            | 0.0690                            | 0.830          | -0.0024                                          | 0.894          | 0.0036                                           | 0.996          | -1.4×10 <sup>-5</sup>                              | 0.840          |
| 2            | 0.0502                            | 0.979          | 0.0002                                           | 0.897          | 0.0044                                           | 0.936          | 2.0×10 <sup>-6</sup>                               | 0.820          |
| 3            | 0.0374                            | 0.897          | 0.00016                                          | 0.740          | 0.0053                                           | 0.925          | 1.8×10 <sup>-6</sup>                               | 0.572          |
